# Supplementary material
Source: PubMed Central journal article supplement (PMC3994895)

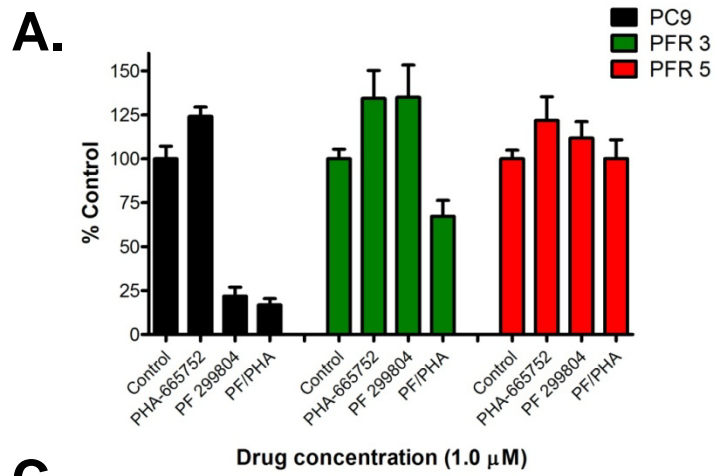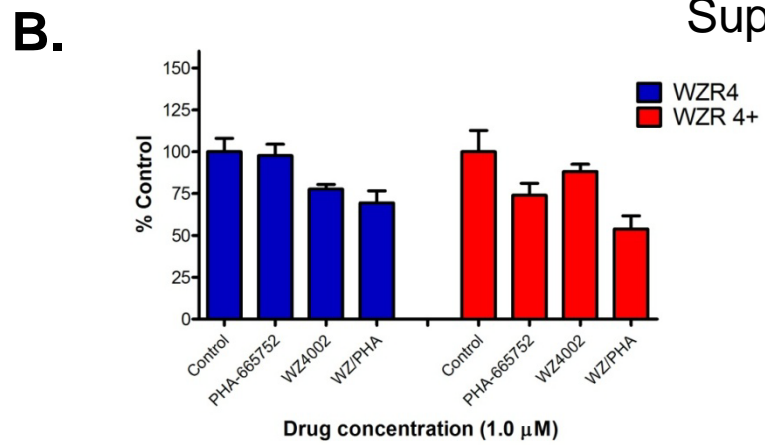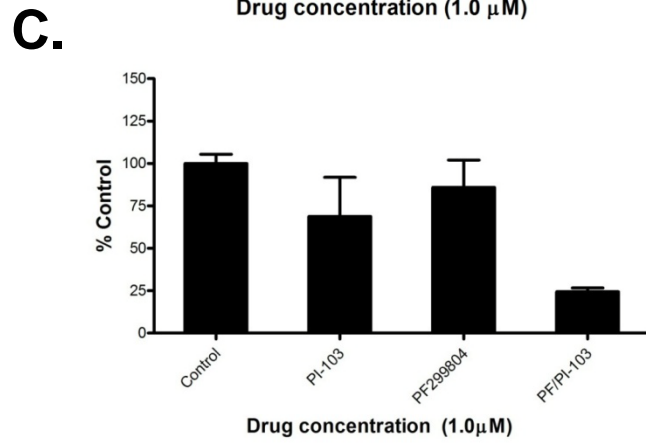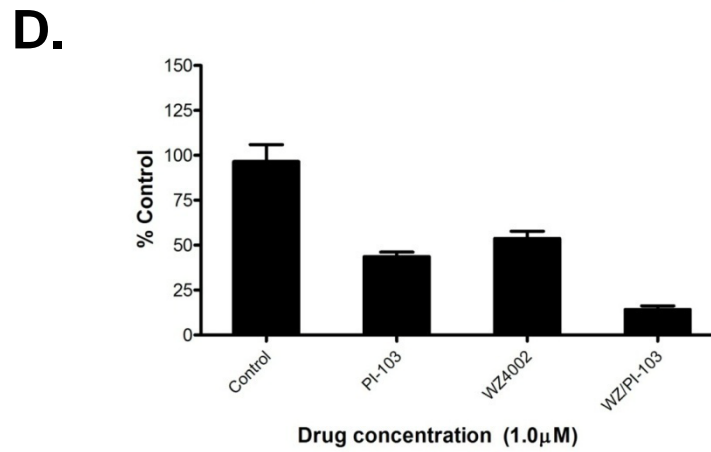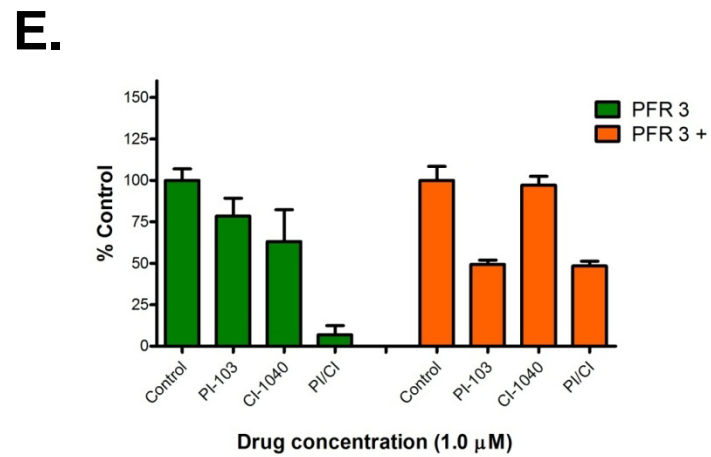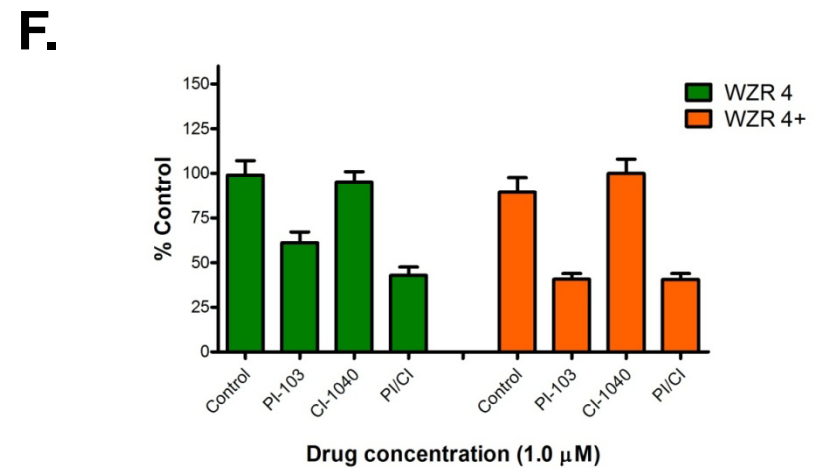

A.

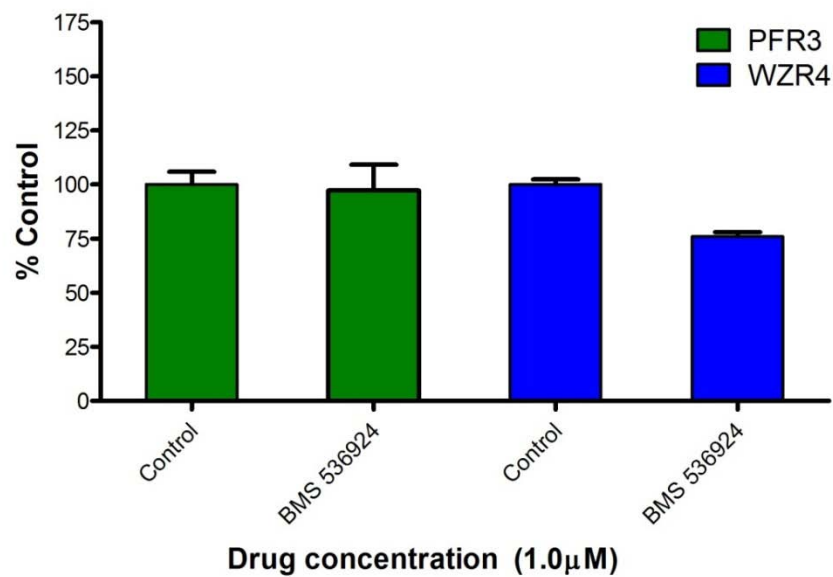

B.

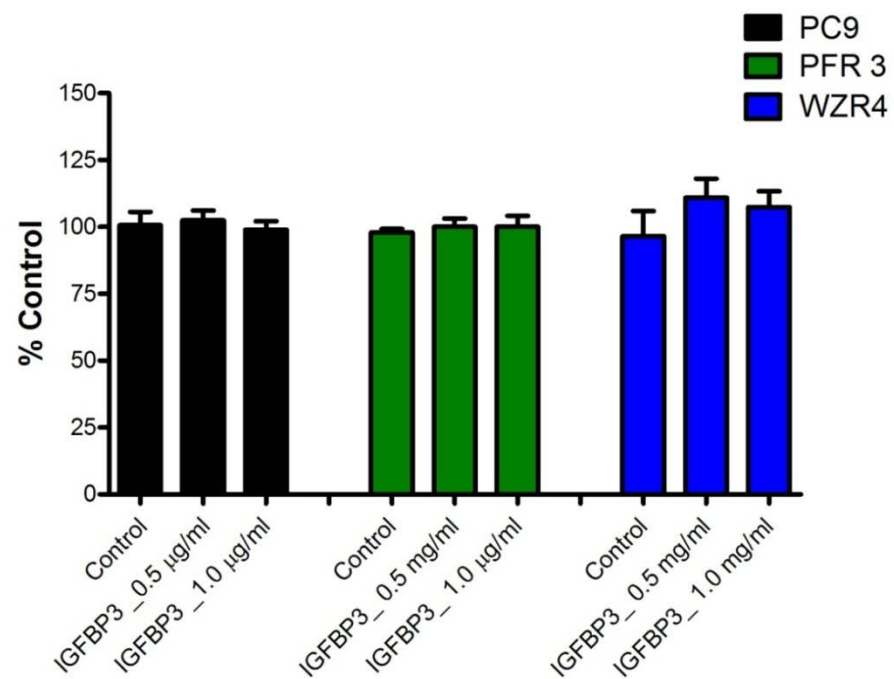

**A.**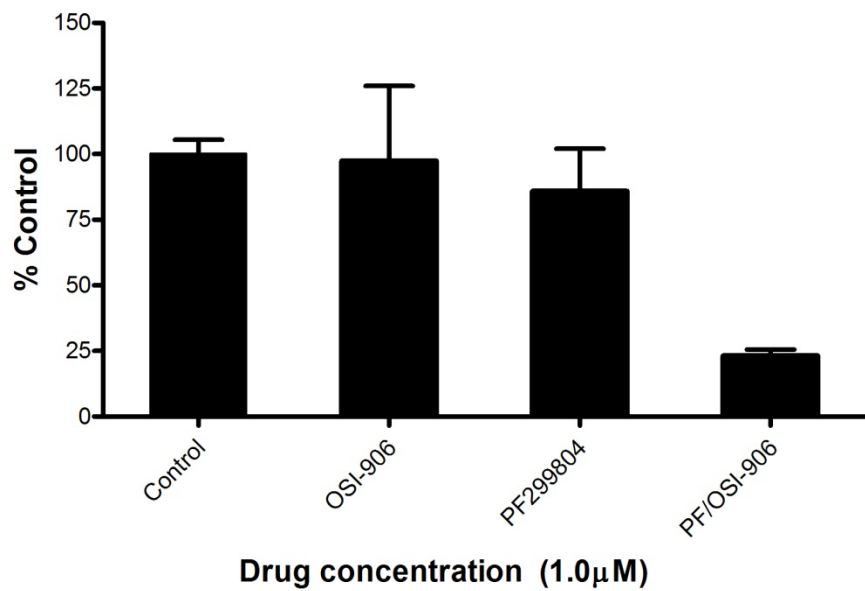**B.**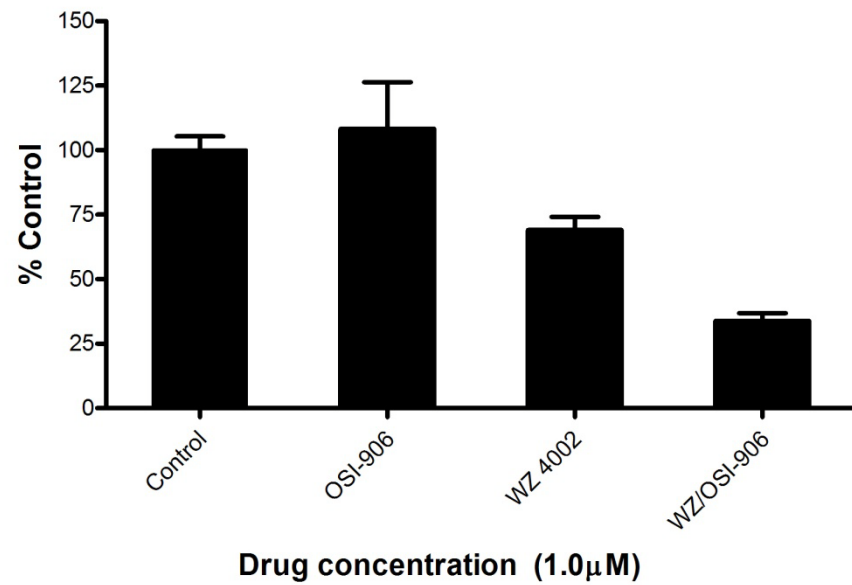

**A**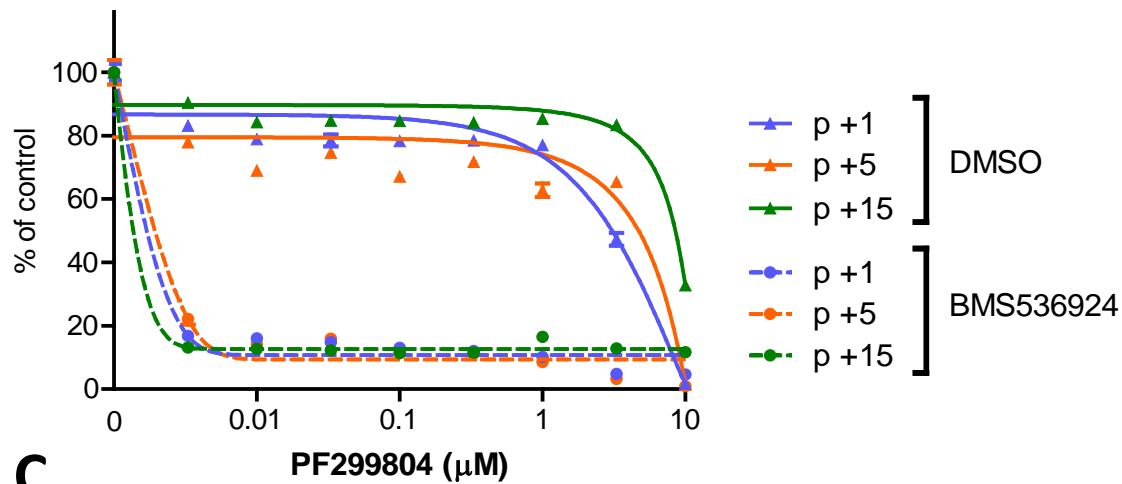**C**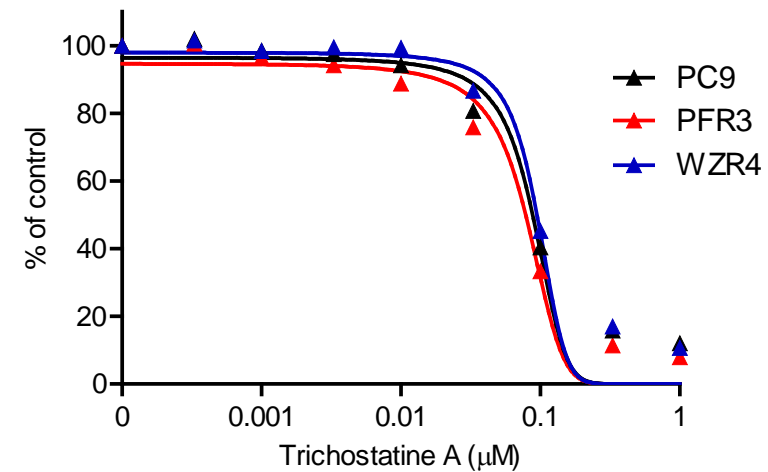**B**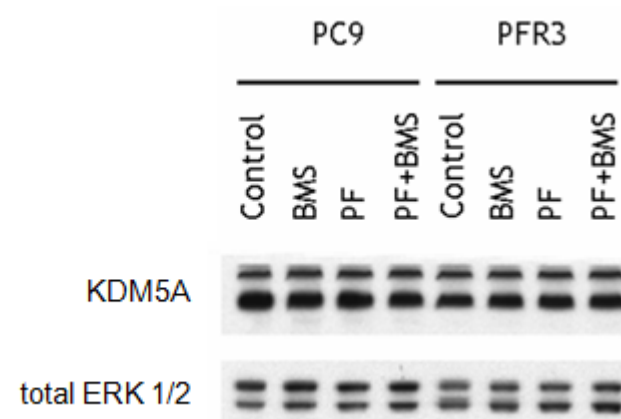

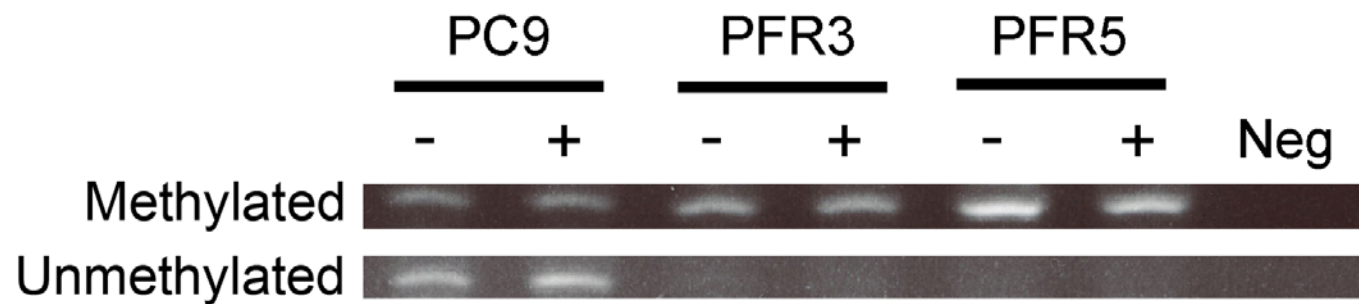

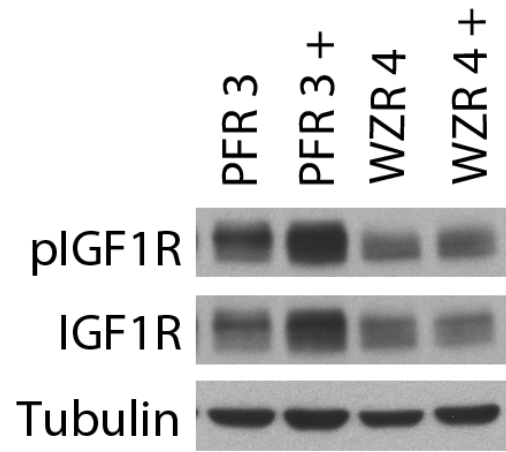

**% of control**





**A**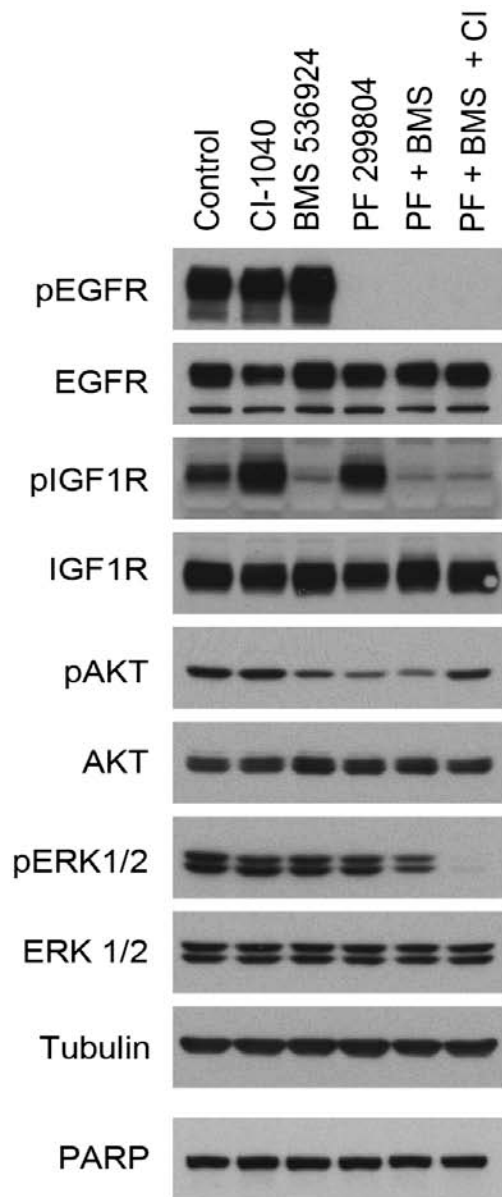**B**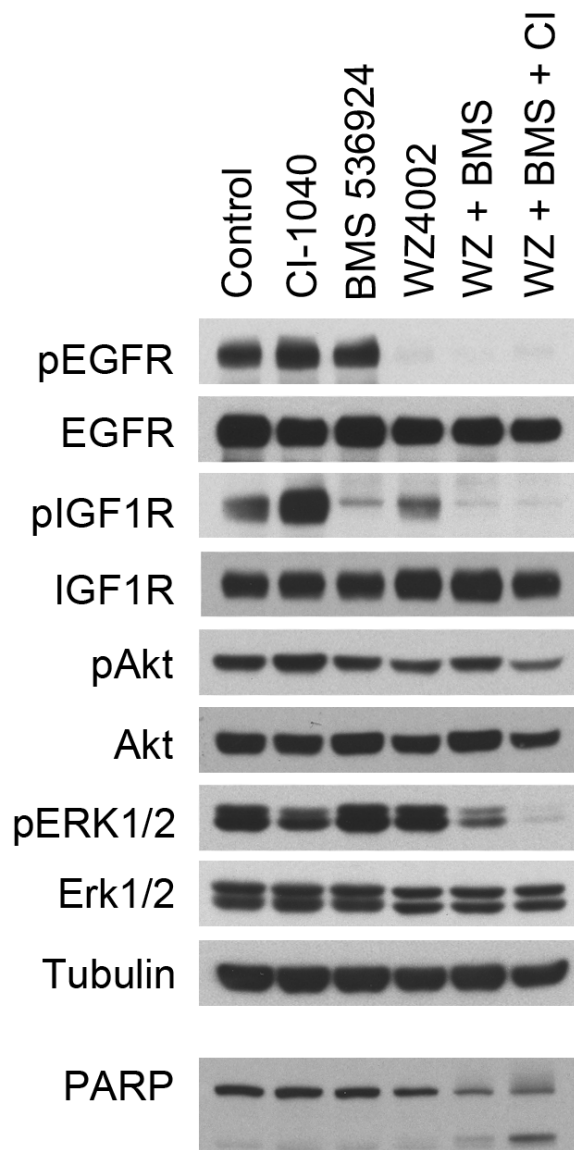

## Supplementary Figure Legends

**Figure S1. PI3K inhibition restores sensitivity to PF299804 and WZ4002.** **A.** MET inhibition does not restore sensitivity to PF299804. Cells were treated with PHA-665,752, PF299804 or with the combination of both drugs at the indicated concentrations, and viable cells were measured after 72 hours of treatment and plotted relative to untreated controls. **B.** WZR4 and WZR4 + cells were treated as in A. **C.** PFR3 cells were treated with PI-103, PF299804 or with the combination of both drugs at the indicated concentrations, and viable cells were measured after 72 hours of treatment and plotted relative to untreated controls. **D.** WZR4 cells were treated as in C. **E.** PFR3 and PFR3+ cells were treated with PI-103, CI-1040 or with the combination of both drugs at the indicated concentrations, and viable cells were measured after 72 hours of treatment and plotted relative to untreated controls. **F.** WZR4 and WZR 4+ cells were treated as in E.

**Figure S2. IGF1R inhibition alone does not effect growth of PFR or WZR cells.** **A.** PFR3 and WZR4 cells were treated with BMS 536924 at the indicated concentration, and viable cells were measured after 72 hours of treatment and plotted relative to untreated controls. **B.** PC9, PFR3 and WZR4 cells were treated with IGFBP3 at the indicated concentrations, and viable cells were measured after 72 hours of treatment and plotted relative to untreated controls.

**Figure S3. OSI-906 restores sensitivity to PF299804 and WZ4002 in the PFR and WZR cells.** **A.** PFR3 cells were treated with OSI-906 alone, PF299804 alone or with the combination of both drugs at the indicated concentration, and viable cells were measured after 72 hours of treatment

and plotted relative to untreated controls. **B.** WZR cells were treated with OSI-906 alone, WZ4002 alone or with the combination of both drugs as in A.

**Figure S4. PFR3 cells do not share the characteristics of “drug-tolerant cells”** **A.** Sensitivity of PFR3 cells to the combination of BMS536924 (1  $\mu$ M) and PF299804 (indicated concentrations) is maintained after 15 passages. Viable cells were measured after 72 hours of treatment. **B.** PFR3 cells do not have elevated levels of the chromatin-modifying enzyme KDM5A/RBP2/Jarid1A compared to parental PC9 cells. Cells were treated for 6 hours with either PF299804 (PF, 1  $\mu$ M) alone, BMS536924 (BMS, 1  $\mu$ M) alone or with both agents. Cells were lysed, and the indicated proteins were detected by immunoblotting. **C.** PFR and WZR cells are not more sensitive to the HDAC inhibitor trichostatin A than parental PC9 cells. Viable cells were measured after 72 hours of treatment.

**Figure S5. IGFBP3 promoter methylation is present in the PFR3 and PFR5 cells.**

Methylation specific PCR was used to evaluate methylation status at IGFBP3 locus in PC9, PFR3 and PFR5 cells. Both methylated and unmethylated promoter sequences are detected in the parental PC9 cells. In contrast, only methylated IGFBP3 sequences are identified in the PFR3 and PFR5 cells.

**Figure S6. IGF1R and pIGFR1R levels are similar in the PFR3 and PFR3+, and WZR4 and WZR4+ cells.** Cell extracts were immunoblotted to detect the indicated proteins.

**Figure S7.** PFR5 and PFR5+ cells grow in a similar fashion. Equal numbers of PFR5 and PFR5+ cells were grown in the absence or presence of PF299804. Colonies were counted after 15 days of treatment with or without PF299804 (1  $\mu$ M).

**Figure S8. Drug resistant PFR3+ and PFR5 cells exhibit loss of DUSP 6. A.** Comparison of expression profiles of PFR3 and PFR3+ cells. DUSP6 is one of the most downregulated genes in the PFR3+ cells. **B.** The indicated cell lines were treated with PF299804 (1  $\mu$ M) for 6 hours. Cells were lysed, and the indicated proteins were detected by immunoblotting. **C.** The indicated cell lines were treated with CI-1040 (1  $\mu$ M) for 6 hours. Cells were lysed, and the indicated proteins were detected by immunoblotting.

**Figure S9.** Effect of EGFR inhibitors (PF299804 or WZ4002) alone, BMS 53924 alone, CI-1040 alone or the combination of all 3 agents on cell signaling in the PFR3 + (**A.**) and WZR4 + (**B.**) cells. Cells were lysed, and the indicated proteins were detected by immunoblotting.

Type of file: figure

Label: Figure 7

Filename: CortotetalSupplfigure7.pdf

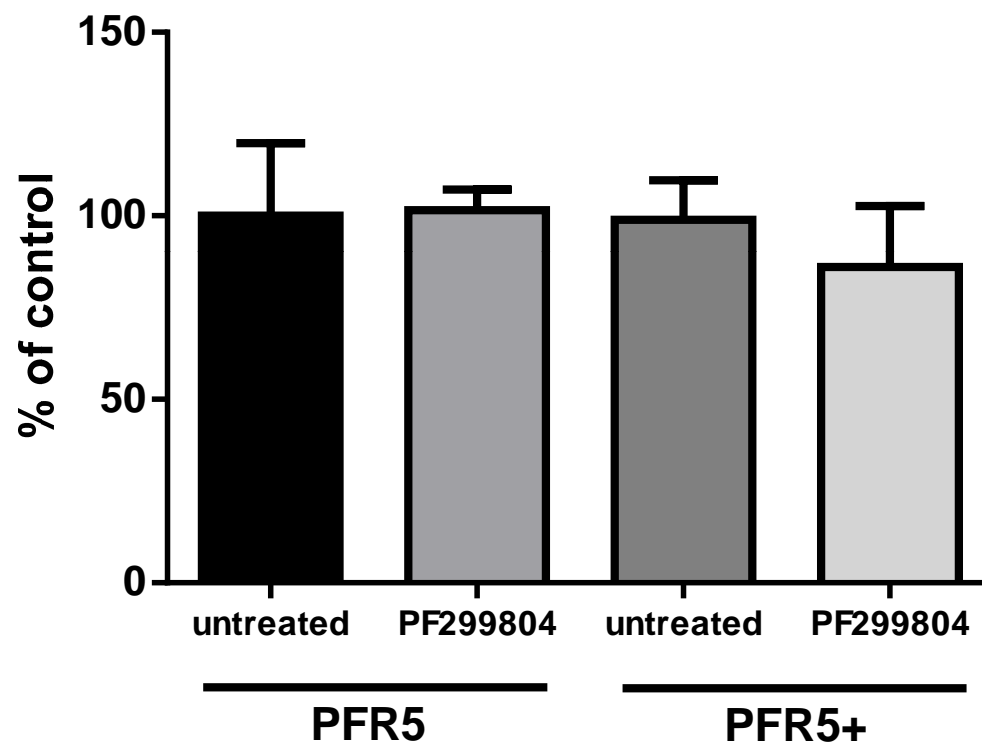

Supplement: NIHMS568075-supplement-supplement_1.pdf [file NIHMS568075-supplement-supplement_1.pdf]
